# Supplementary material for: Bifidobacterium breve intervention combined with environmental enrichment alleviates cognitive impairment by regulating the gut microbiota and microbial metabolites in Alzheimer’s disease mice
Source: PubMed Central journal article supplement (PMC9530393; doi:10.3389/fimmu.2022.1013664), 2022-09-20
Supplement: DataSheet_1.pdf [file DataSheet_1.pdf]

## Supplementary Material

### 1 Supplementary Methods

#### 1.1 Behavioral tests

##### 1.1.1 Y-maze

The Y-maze used in this study do not involve any training, reward, or punishment. Before testing, mice were habituated to the room for 30 min. Then, each mouse was placed in the center of the symmetrical Y-maze and was allowed to explore freely for 6 minutes. An alternation was considered by consecutive entry into all three arms. The number of maximum alternation was therefore the total number of arm entries minus 2, and the percentage of alternation was calculated as (actual alternations / maximum alternations)  $\times$  100.

##### 1.1.2 Morris water maze

In MWM, mice were trained over five consecutive days during the acquisition phase, with four training trials using four start locations each day. On day six, the platform was removed and a probe trial lasting 60 s was conducted. The time to find the platform (escape latency) was the parameter to evaluate memory. Swimming trajectories were recorded using the Ethovision 11.5 automated tracking system (Noldus, Wageningen, Netherlands).

##### 1.1.3 Novel object recognition task

Before testing, mice were habituated to the room for 60 min. On the pre-trial day, mice were placed in an empty, open arena and allowed to explore freely for 8 min. On the following day, each mouse was exposed for 8 min to two identical objects placed in the center of the arena (acquisition phase). 3 h later, one of the familiar objects was substituted with a novel object and the animal was allowed to explore the objects for 8 min (retention phase). Discrimination ratio was calculated according to the formula:  $(t(\text{novel}) - t(\text{familiar})) / (t(\text{novel}) + t(\text{familiar}))$ .

##### 1.1.4 Passive avoidance test

The apparatus chamber used in this test is composed of a black poorly illuminated compartment and a white illuminated compartment. Briefly, during the training test, the mouse was placed in the white compartment. When the mouse innately crossed to the black compartment, it received a mild foot shock. During the retention test, passive avoidance response was evaluated 24 h after foot-shock. Latency time was measured until the mouse entered the dark chamber completely.

#### 1.2 Metabolomics

##### 1.2.1 Metabolite sample preparation

Metabolites in fecal samples were extracted as detailed in Mars *et al* (1). Briefly, fecal samples were weighed on an analytical balance (sample weights  $\sim$ 50 mg) after which 1 mL of pre-cooled extraction solvent (methanol: acetonitrile: ultra-pure water = 2:2:1, v/v) were added to each sample, and vigorously mixed for 30 s. The fecal samples were then grinded by a frozen tissue grinder (60 Hz, 60 s) and extracted in a sonication bath for 20 min. Extracts were cleared of debris via centrifugation at

14,000 × g, for 15 minutes at 4 °C, and the resulting supernatant was transferred into a new microfuge tube. Samples were concentrated using a SpeedVac system (Thermo Fisher Scientific, MA, USA) and vacuum dried. Before analysis, dried samples were reconstituted in 50% acetonitrile (v/v) and transferred to a glass autosampler vial. For quality control purpose, a QC sample was prepared by pooling 10 uL of every sample.

### 1.2.2 HPLC-MS analysis parameters

The metabolite samples were analyzed with an UItiMate 3000 HPLC system (Thermo Fisher Scientific, MA, USA) coupled to a high-resolution Q Exactive mass spectrometer (Thermo Fisher Scientific, MA, USA). Chromatographic separation was achieved on a Waters Acquity UPLC HSS T3 column (2.1 × 100 mm, 1.8 μm; Waters, Milford, USA) over a 15 min gradient. Mobile phases were A) 0.1% formic acid in positive mode or 5 mM ammonium acetate in negative mode and B) 100% acetonitrile. The analytical gradient was: 0-1 min, 2% B; 1-10 min, 98% B; 10-12 min, 98% B; 12.1 min, 2% B; 12.1-15 min, 2% B. Flow rate was 0.3 mL/min with an injection volume of 2 uL for both. Samples were held at 4°C in the autosampler, and the column was operated at 35°C.

ESI source parameters were set as follows: spray voltage, 3.5 KV in positive or negative modes, respectively; sheath gas, 35 arb; aux gas, 15 arb; aux gas heater temperature, 320 °C; capillary temperature, 320 °C. The Q Exactive was run with polarity switching in full scan ddMS2 mode for all samples and QC samples to acquire MS/MS spectra. The full scan parameters were set as: resolution, 70,000; AGC target, 1e6; maximum injection time, 100 ms; scan range, 70–1050 m/z. The ddMS2 scan parameters were set as: resolution, 17,500; AGC target, 1e5; maximum injection time, 50 ms; scan range, 70–1050 m/z; top N setting, 10; isolation width, 1.5 m/z; collision energy mode, stepped; collision energy type, normalized; normalized collision energy (NCE) at 20, 40, 60 eV; dynamic exclusion duration was set as 7 s for excluding after 1 time.

## 2 Supplementary Figures and Tables

### 2.1 Supplementary Figures

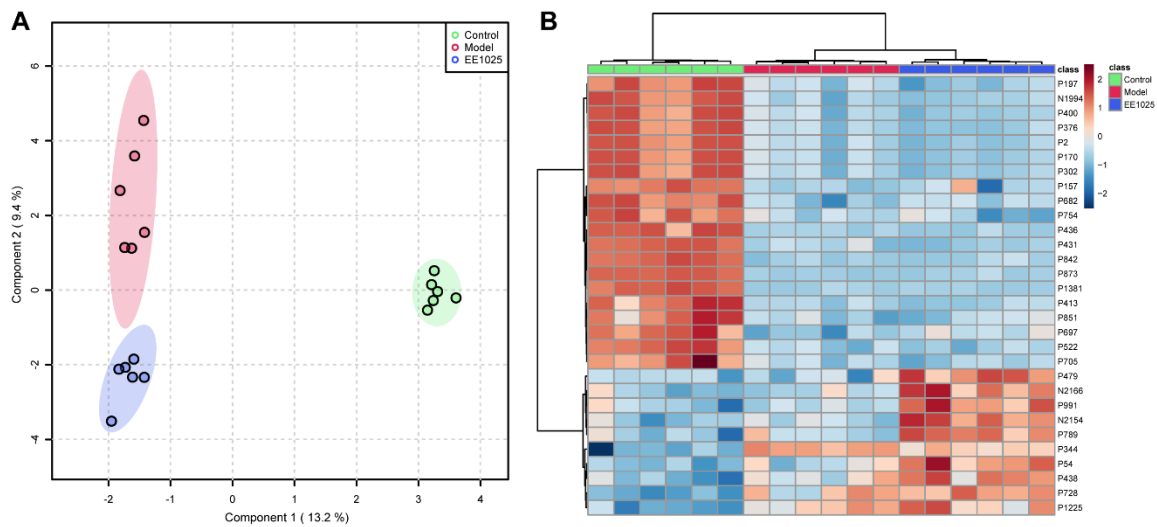

**Supplementary Figure 1.** Multivariate analysis of identified metabolites among three groups. (A) Sparse PLS-DA score plot for fecal samples among three groups. Number of components: 6. (B) Hierarchical cluster analysis of differential metabolites (top 30). The name of differential metabolites was listed in Supplementary Tables S1.

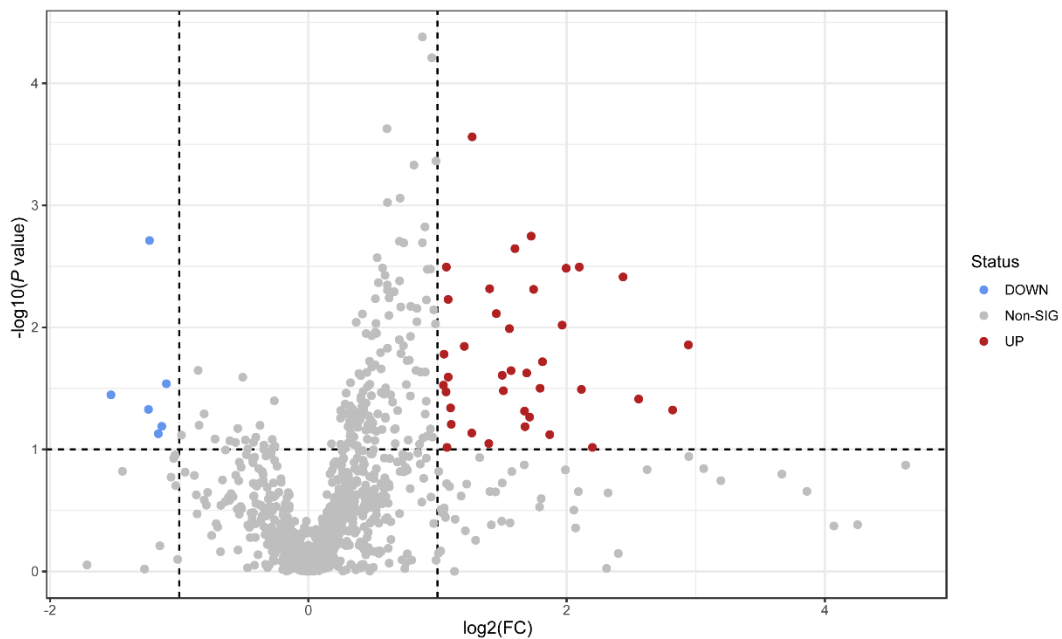

**Supplementary Figure 2.** Important features selected by volcano plot between model and EE + *B. breve* CCFM1025 groups. Fold change > 2, adjusted *P* value < 0.1. Metabolites with significant changes are presented in red (upregulated) or blue (downregulated).

## 2.2 Supplementary Tables

**Supplementary Table 1.** The differential metabolites in feces among three groups using one-way ANOVA.

| Metab_ID | Metabolite                                  | P value  | FDR      |
|----------|---------------------------------------------|----------|----------|
| P873     | Dihydrozeatin                               | 6.92E-17 | 6.40E-14 |
| P1381    | Praeruptorin                                | 1.33E-15 | 6.14E-13 |
| P842     | 1-Propyl-1H-purin-6-amine                   | 4.43E-13 | 1.37E-10 |
| P431     | N,N-Bis(2-hydroxyethyl)dodecanamide         | 1.94E-11 | 4.48E-09 |
| P436     | Alvamine                                    | 1.34E-10 | 2.48E-08 |
| P2       | Bis(4-ethylbenzylidene) sorbitol            | 1.13E-09 | 1.74E-07 |
| N1994    | TU4153400                                   | 2.11E-09 | 2.79E-07 |
| P376     | 2,4-Dimethylbenzaldehyde                    | 2.99E-09 | 3.19E-07 |
| P170     | Piribedil                                   | 3.10E-09 | 3.19E-07 |
| P302     | 8'-Hydroxyabscisate                         | 5.33E-09 | 4.93E-07 |
| P522     | Nonyltrimethylammonium                      | 8.15E-09 | 6.85E-07 |
| P400     | 1_5-Anhydro-D-mannitol                      | 9.08E-09 | 7.00E-07 |
| P682     | 12,13-Epoxytrichothec-9-ene-3,4,8,15-tetrol | 1.89E-08 | 1.34E-06 |
| P197     | alpha-methylstyrene                         | 2.30E-08 | 1.52E-06 |
| P413     | 1872050                                     | 1.37E-07 | 8.46E-06 |
| P697     | Cedefingol                                  | 2.61E-07 | 1.51E-05 |
| P344     | 11Z_8Z_14Z-eicosatrienoicacid               | 7.53E-07 | 4.10E-05 |
| P754     | 2,3,4,5,6-pentamethylphenyl                 | 1.31E-06 | 6.76E-05 |
| N2154    | NP-005196                                   | 2.33E-06 | 0.000113 |
| P728     | (4E,7E,10E,13E,16E)-Docosapentaenoyloxy     | 5.68E-06 | 0.000263 |
| P705     | N,N-Dimethyldecylamine N-oxide              | 6.44E-06 | 0.000284 |
| P851     | N-Nonanoylglycine                           | 1.27E-05 | 0.000536 |
| P157     | Triethanolamine                             | 1.35E-05 | 0.000541 |
| P54      | I-Urobilinogen                              | 1.49E-05 | 0.000575 |
| N2166    | Protectin D1                                | 2.43E-05 | 0.000899 |
| P479     | N-(3,5-Dimethoxybenzoyl)glycine             | 3.52E-05 | 0.001251 |
| P789     | Dihydrophaseicacid                          | 3.82E-05 | 0.00131  |
| P991     | 5-hydroxy-3,4-dihydro-2H-naphthalen-1-one   | 3.98E-05 | 0.001315 |
| P1225    | N-Vanillyloleamide                          | 5.35E-05 | 0.001707 |
| P438     | tilisolol                                   | 8.63E-05 | 0.002662 |

**Supplementary Table 2.** The differential metabolites in feces between model and EE + *B. breve* CCFM1025 groups using T-test.

| Metab_ID | Metabolite                                     | P value  | FDR      |
|----------|------------------------------------------------|----------|----------|
| N2154    | NP-005196                                      | 4.17E-05 | 0.028522 |
| P991     | 5-hydroxy-3,4-dihydro-2H-naphthalen-1-one      | 6.17E-05 | 0.028522 |
| P789     | Dihydrophaseicacid                             | 0.000235 | 0.063489 |
| N2166    | Protectin D1                                   | 0.000275 | 0.063489 |
| P479     | N-(3,5-Dimethoxybenzoyl)glycine                | 0.000433 | 0.072052 |
| P1295    | 3-Methyl-1-(2_4_6-trihydroxyphenyl)butan-1-one | 0.000467 | 0.072052 |
| P409     | Didecyldimethylammonium                        | 0.000874 | 0.10944  |

|       |                                                                                         |          |         |
|-------|-----------------------------------------------------------------------------------------|----------|---------|
| P69   | 2-Hydroxycinnamic acid                                                                  | 0.000946 | 0.10944 |
| P1339 | (DL)-3-O-Methyldopa                                                                     | 0.001501 | 0.13404 |
| P54   | I-Urobilinogen                                                                          | 0.001787 | 0.13404 |
| P363  | N1_N12-Diacetylspermine                                                                 | 0.001941 | 0.13404 |
| P223  | dihomomethionine                                                                        | 0.001969 | 0.13404 |
| P428  | Pilocarpine                                                                             | 0.002023 | 0.13404 |
| P1524 | 4-methoxy-6-(prop-2-en-1-yl)-2H-1,3-benzodioxole                                        | 0.002029 | 0.13404 |
| N2305 | 3_4-Dimethoxycinnamicacid                                                               | 0.002262 | 0.13946 |
| P664  | 2,6-DIAMINO-4-NITROTOLUENE                                                              | 0.002685 | 0.14068 |
| N2144 | prohydrojasmon                                                                          | 0.003203 | 0.14068 |
| N2292 | 1,7-Dihydroxy-6,6-dimethyl-3,5,5a,6,7,8,9a,9b-octahydronaphtho[1,2-c]furan-9(1H)-one    | 0.003205 | 0.14068 |
| P356  | L-Tyrosinemethylester                                                                   | 0.003258 | 0.14068 |
| P1652 | Civetone                                                                                | 0.003275 | 0.14068 |
| N2167 | Alachlor ESA                                                                            | 0.003333 | 0.14068 |
| P158  | 3-(propan-2-yl)-octahydropyrrolo[1,2-a]pyrazine-1,4-dione                               | 0.003346 | 0.14068 |
| P277  | IRH                                                                                     | 0.003749 | 0.1488  |
| N2246 | NP-004768                                                                               | 0.003861 | 0.1488  |
| P420  | asn-pro                                                                                 | 0.00416  | 0.15222 |
| P1194 | Trilostane                                                                              | 0.004299 | 0.15222 |
| P1051 | NP-018711                                                                               | 0.004496 | 0.15222 |
| P856  | 6-Benzamidopurine                                                                       | 0.004824 | 0.15222 |
| P1594 | Pregnenolone                                                                            | 0.00488  | 0.15222 |
| N1950 | 5-Hydroxy-3-(4-hydroxy-3-methoxyphenyl)-7-methoxy-8-methyl-2,3-dihydro-4H-chromen-4-one | 0.004964 | 0.15222 |

**Supplementary Table 3.** The significantly altered metabolites used for pathway enrichment analysis.

| Metab_ID | Metabolite                              | P value  | HMDB ID     | KEGG ID |
|----------|-----------------------------------------|----------|-------------|---------|
| P54      | I-Urobilinogen                          | 0.001787 | HMDB0001898 | C05790  |
| P138     | N8-Acetylspermidine                     | 0.028946 | HMDB0002189 | C01029  |
| P144     | 5-Hydroxyindoleacetic acid              | 0.033765 | HMDB0000763 | C05635  |
| P156     | tranexamic acid                         | 0.025543 | HMDB0014447 | C12535  |
| P167     | Xanthurenic acid                        | 0.065116 | HMDB0000881 | C02470  |
| P173     | (9S_10S)-9_10-Dihydroxyoctadecanoate    | 0.035708 | HMDB0059633 | C15988  |
| P205     | 7-Methylguanine                         | 0.062308 | HMDB0000897 | C02242  |
| P212     | Prolylleucine                           | 0.054318 | HMDB0028867 | -       |
| P262     | Adenosine                               | 0.005903 | HMDB0000050 | C00212  |
| P266     | 3-Aminosalicylic acid                   | 0.038646 | HMDB0001972 | -       |
| P275     | gamma-Glutamyl-gamma-aminobutyraldehyde | 0.010239 | METPA1197   | C15700  |
| P329     | Tryptophan                              | 0.032236 | HMDB0000929 | C00078  |
| P331     | Indole-3-acetic acid                    | 0.096269 | HMDB0000197 | C00954  |
| P337     | Xanthurenic acid                        | 0.024687 | HMDB0000881 | C02470  |
| P338     | Geranylacetate                          | 0.04758  | HMDB0035157 | C09861  |
| P363     | N1_N12-Diacetylspermine                 | 0.001941 | HMDB0002172 | C03413  |

|       |                                                                                                             |          |             |        |
|-------|-------------------------------------------------------------------------------------------------------------|----------|-------------|--------|
| P379  | Kynurenic acid                                                                                              | 0.033077 | HMDB0000715 | C01717 |
| P415  | 4-Octyl-1,3-cyclopentanedione                                                                               | 0.013916 | -           | -      |
| P422  | (1S,2R,5S)-2-Isopropyl-5-methylcyclohexyl 3-oxobutanoate                                                    | 0.019127 | -           | -      |
| P468  | N2-(D-1-Carboxyethyl)-L-lysine                                                                              | 0.047    | METPA0456   | C04020 |
| P496  | N-(3,5-Dimethoxybenzoyl)glycine                                                                             | 0.073422 | HMDB0029083 | -      |
| P499  | Pseudouridine                                                                                               | 0.096263 | HMDB0000767 | C02067 |
| P575  | asp-leu                                                                                                     | 0.075649 | HMDB0028757 | -      |
| P606  | NP-018660                                                                                                   | 0.023641 | -           | -      |
| P622  | NP-019811                                                                                                   | 0.045701 | -           | -      |
| P707  | N,N-Dimethyl-N-phenylurea                                                                                   | 0.029772 | HMDB0001020 | C02846 |
| P749  | 3082                                                                                                        | 0.048546 | HMDB0003424 | C00823 |
| P810  | Isorhapontigenin                                                                                            | 0.031545 | HMDB0128522 | -      |
| P856  | 6-Benzamidopurine                                                                                           | 0.004824 | -           | -      |
| P1053 | DA9185000                                                                                                   | 0.022621 | -           | -      |
| P1054 | (2R)-2-[[[(1R,2S,3R,4R,5R)-4-Acetamido-2-hydroxy-6,8-dioxabicyclo[3.2.1]oct-3-yl]oxy]propanoic acid         | 0.064682 | -           | -      |
| P1090 | 10-HDA                                                                                                      | 0.014298 | HMDB0060037 | -      |
| P1594 | Pregnenolone                                                                                                | 0.00488  | HMDB0000253 | C01953 |
| P1652 | Civetone                                                                                                    | 0.003275 | HMDB0031336 | -      |
| N1935 | Nonanoic acid                                                                                               | 0.074426 | HMDB0000847 | C01601 |
| N2011 | Rhapontigenin                                                                                               | 0.089517 | HMDB0031842 | -      |
| N2067 | 5-Nonyl-2-oxotetrahydro-3-furancarboxylic acid                                                              | 0.007709 | -           | -      |
| N2113 | NP-021701                                                                                                   | 0.00958  | -           | -      |
| N2144 | prohydrojasmon                                                                                              | 0.003203 | -           | -      |
| N2149 | (2S)-N2-[(2S)-1-amino-3-cyclohexyl-1-oxo-2-propanyl]-N1-isopropyl-N4-phenyl-1,2,4-piperazinetri-carboxamide | 0.016578 | -           | -      |
| N2166 | Protectin D1                                                                                                | 0.000275 | HMDB0003689 | -      |
| N2246 | NP-004768                                                                                                   | 0.003861 | -           | -      |
| N2292 | 1,7-Dihydroxy-6,6-dimethyl-3,5,5a,6,7,8,9a,9b-octahydronaphtho[1,2-c]furan-9(1H)-one                        | 0.003205 | -           | -      |
| N2305 | 3_4-Dimethoxycinnamicacid                                                                                   | 0.002262 | HMDB0032226 | -      |
